# Supplementary material
Source: PubMed Central journal article supplement (PMC2724055)
Supplement: P900029-JLR200_1.pdf [file P900029-JLR200_1.pdf]

Table S1. Estimates from mixed regression models of the association of a 180 MET-minutes/week increase in baseline moderate-to-vigorous or vigorous physical activity from sports/exercise with lipid parameters over each visit period of approximately 3 years.

|                   |                   | Men                                 |                                      | Women                              |                                |
|-------------------|-------------------|-------------------------------------|--------------------------------------|------------------------------------|--------------------------------|
|                   |                   | Moderate/vigorous                   | Vigorous                             | Moderate/vigorous                  | Vigorous                       |
| Whites            | HDL               | 2.90 (1.88, 3.92) <sup>a</sup>      | 4.88 (3.56, 6.20) <sup>a</sup>       | 4.89 (3.43, 6.35) <sup>a</sup>     | 6.49 (4.33, 8.66) <sup>a</sup> |
|                   | LDL               | 0.13 (-2.57, 2.83)                  | -1.73 (-5.22, 1.76)                  | -3.96 (-7.09, -0.83) <sup>a</sup>  | -2.93 (-7.56, 1.70)            |
|                   | Total cholesterol | 0.43 (-2.50, 3.37)                  | -1.34 (-5.14, 2.45)                  | -1.43 (-4.70, 1.84)                | 1.09 (-3.75, 5.92)             |
|                   | Triglycerides     | -12.24 (-18.97, -5.50) <sup>a</sup> | -20.62 (-29.32, -11.92) <sup>a</sup> | -9.03 (-15.15, -2.91) <sup>a</sup> | -7.47 (-16.55, 1.60)           |
| African Americans | HDL               | 4.74 (1.66, 7.82) <sup>a</sup>      | 5.69 (2.13, 9.24) <sup>a</sup>       | 3.72 (0.67, 6.76) <sup>a</sup>     | 4.03 (-0.56, 8.62)             |
|                   | LDL               | -1.09 (-8.52, 6.34)                 | -2.77 (-11.33, 5.79)                 | -9.55 (-16.37, -2.73) <sup>a</sup> | -6.83 (-17.12, 3.45)           |
|                   | Total cholesterol | 1.96 (-5.76, 9.68)                  | 0.92 (-7.97, 9.82)                   | -6.23 (-13.36, 0.91)               | -4.57 (-15.24, 6.09)           |
|                   | Triglycerides     | -8.23 (-19.57, 3.11)                | -7.83 (-19.35, 3.69)                 | -4.64 (-14.54, 5.25)               | -4.68 (-19.44, 10.08)          |

β (95% confidence interval)\*180 MET-minutes/week shown

<sup>a</sup>p<0.05; HDL, high density lipoprotein cholesterol; LDL, low density lipoprotein cholesterol

Table S2. Estimates from mixed regression models controlled for BMI of the association of a 180 MET-minutes/week increase in baseline physical activity from sports/exercise with lipid parameters over each visit period of approximately 3 years.

|                   | Men                                |                                | Women                          |                                     |
|-------------------|------------------------------------|--------------------------------|--------------------------------|-------------------------------------|
|                   | Whites                             | African Americans              | Whites                         | African Americans                   |
| HDL               | 2.19 (1.21, 3.17) <sup>a</sup>     | 4.27 (1.38, 7.16) <sup>a</sup> | 3.56 (2.18, 4.94) <sup>a</sup> | 3.00 (0.02, 5.00) <sup>a</sup>      |
| LDL               | 0.61 (-2.11, 3.33)                 | -1.35 (-8.72, 6.01)            | -2.21 (-5.33, 0.91)            | -10.41 (-17.25, -3.56) <sup>a</sup> |
| Total cholesterol | 1.11 (-1.85, 4.07)                 | 1.74 (-5.97, 9.45)             | 0.14 (-3.14, 3.42)             | -7.60 (-14.75, -0.44) <sup>a</sup>  |
| Triglycerides     | -7.55 (-14.16, -0.95) <sup>a</sup> | -7.28 (-16.99, 2.42)           | -3.02 (-8.91, 2.88)            | -3.90 (-13.85, 6.05)                |

β (95% confidence interval)\*180 MET-minutes/week shown

<sup>a</sup>p<0.05; HDL, high density lipoprotein cholesterol; LDL, low density lipoprotein cholesterol

Models controlled for baseline age, education, smoking status, ARIC field center, visit, and BMI
